# Supplementary material
Source: PubMed Central journal article supplement (PMC8273131)
Supplement: NIHMS1708251-supplement-1.pdf [file NIHMS1708251-supplement-1.pdf]

## Supporting Information

### **Nanoparticles for co-delivery of Osimertinib and Selumetinib to Overcome Osimertinib-acquired Resistance in Non-small Cell Lung Cancer**

Wu Chen<sup>1,#</sup>, Danlei Yu<sup>2,3,#</sup>, Shi-Yong Sun<sup>3,\*</sup>, Feng Li<sup>1,\*</sup>

1. Department of Drug Discovery and Development, Harrison School of Pharmacy, Auburn University, Auburn, AL 36849 USA
2. Department of Oncology, The Second Xiangya Hospital, Central South University, Changsha, Hunan, P. R. China
3. Department of Hematology and Medical Oncology, Emory University School of Medicine and Winship Cancer Institute, Atlanta, GA 30322 USA

# Equal contribution

\* Corresponding authors:

**Shi-Yong Sun, PhD**

Emory University School of Medicine  
1365 Clifton Road, C-3088, Atlanta, GA 30322.  
E-mail: [ssun@emory.edu](mailto:ssun@emory.edu)

**Feng Li, PhD**

Auburn University  
720 S. Donahue Dr. Auburn, AL 36849, USA  
Tel:334-844-7406  
Email: [FZL0023@auburn.edu](mailto:FZL0023@auburn.edu)

## **Methods**

### **Determination of Intracellular ROS.**

The intracellular ROS was determined with a DCFH-DA dye method. Briefly, cells were seeded into a 12-well plate at a density of 100,000 cells per well and incubated overnight. Cells were treated with DCFH-DA (20  $\mu$ M) in serum-free medium at 37 °C for 3 hours. At the end of treatment, cells were washed, collected, and analyzed by flow cytometry (BD Accuri C6 Plus).

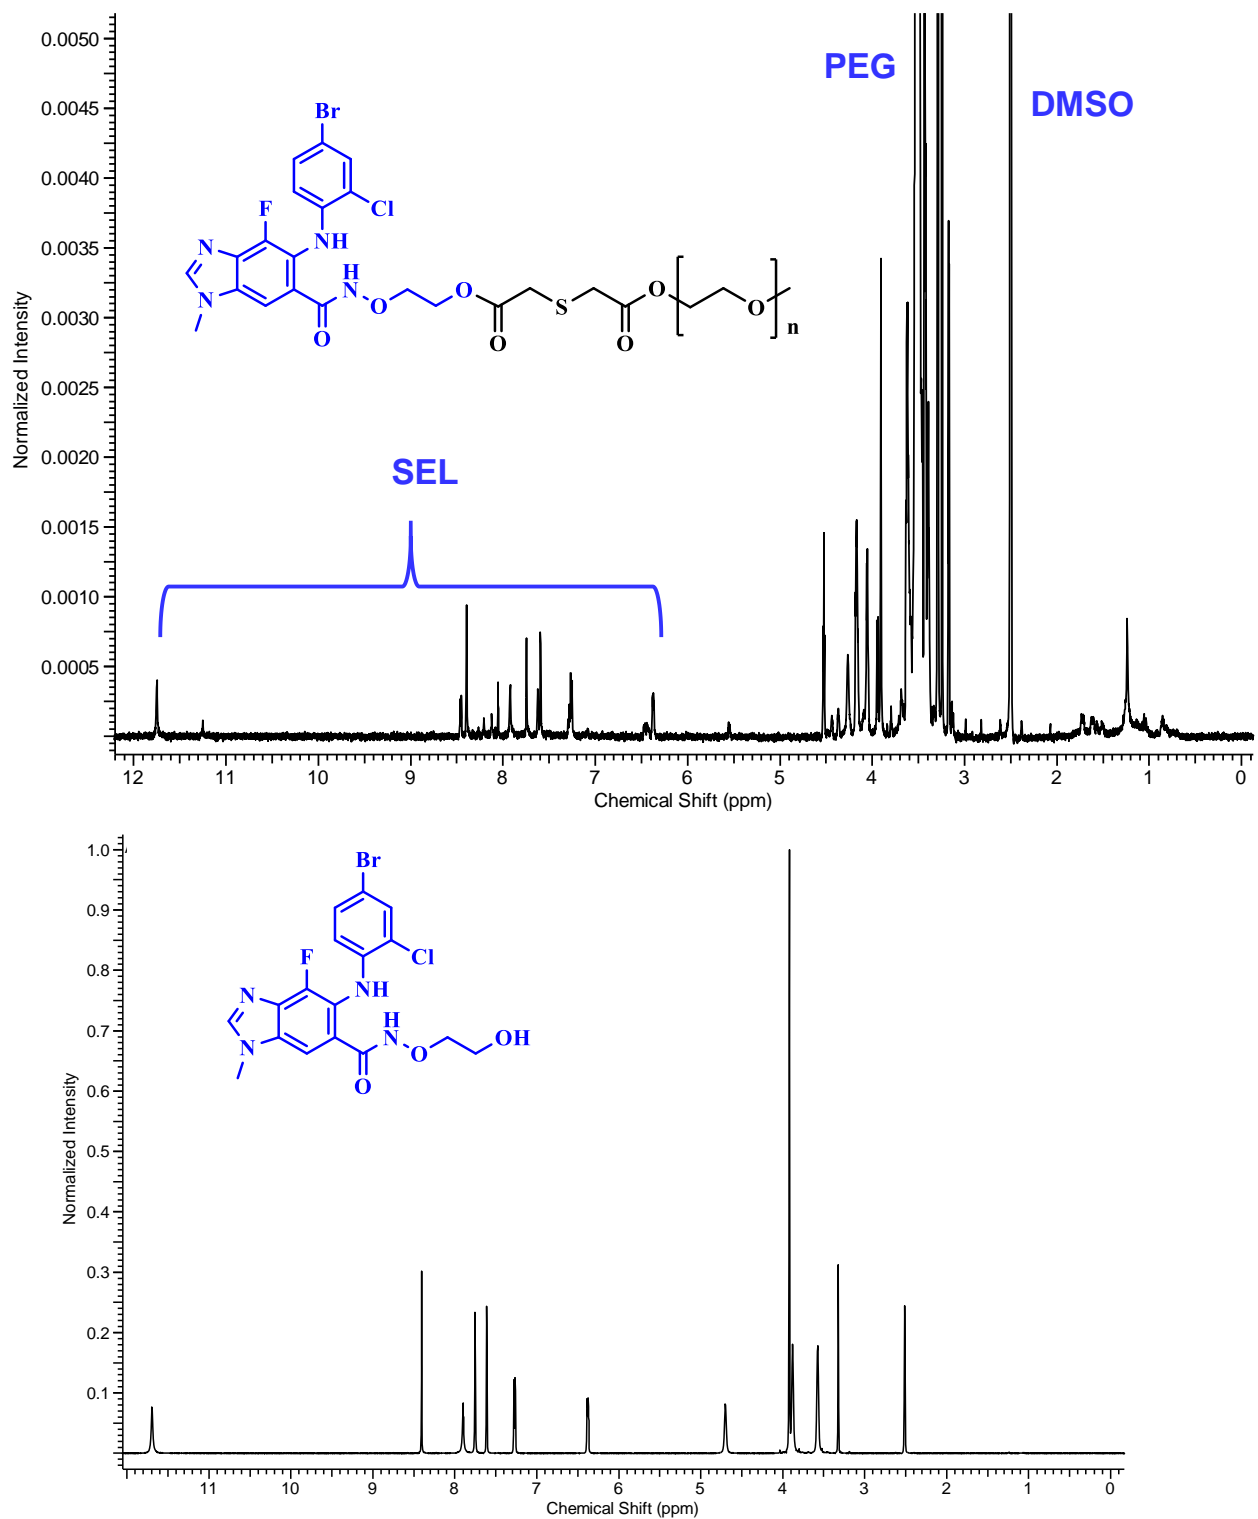

**Figure S1.** <sup>1</sup>H-NMR of PEG-SEL conjugate and SEL free drug in DMSO.

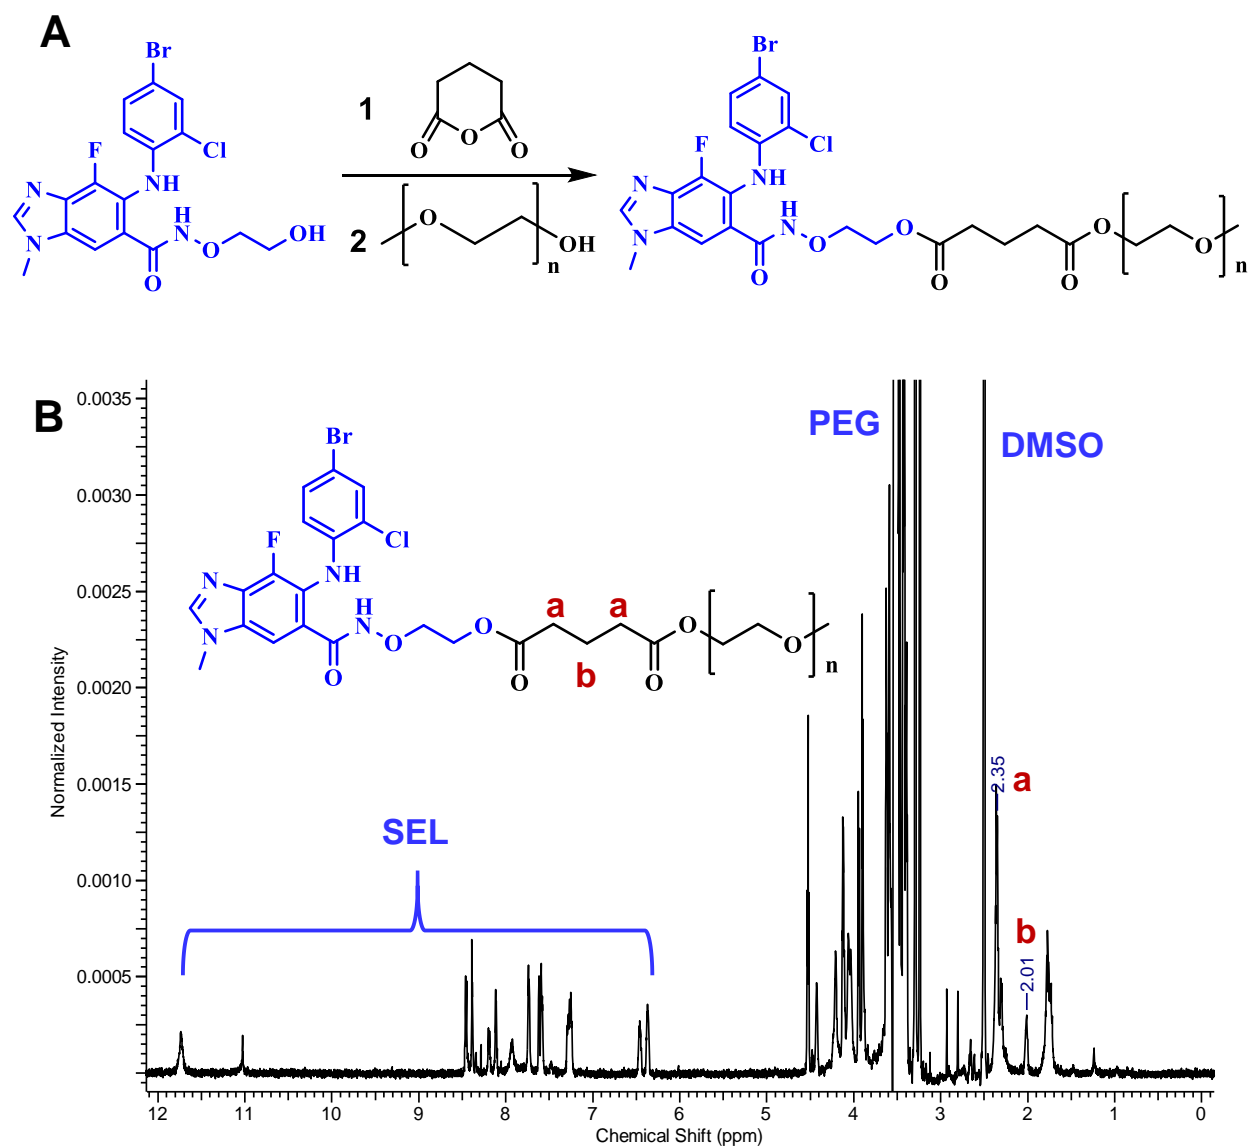

**Figure S2.** (A) Synthesis procedure of PEG-SEL conjugate with a NON-ROS responsive ester linker (PEG-C-SEL). 1. EDCI, HOBT, DMF; 2. DCC, DMAP, DMF. (B)  $^1\text{H-NMR}$  of PEG-C-SEL in DMSO.

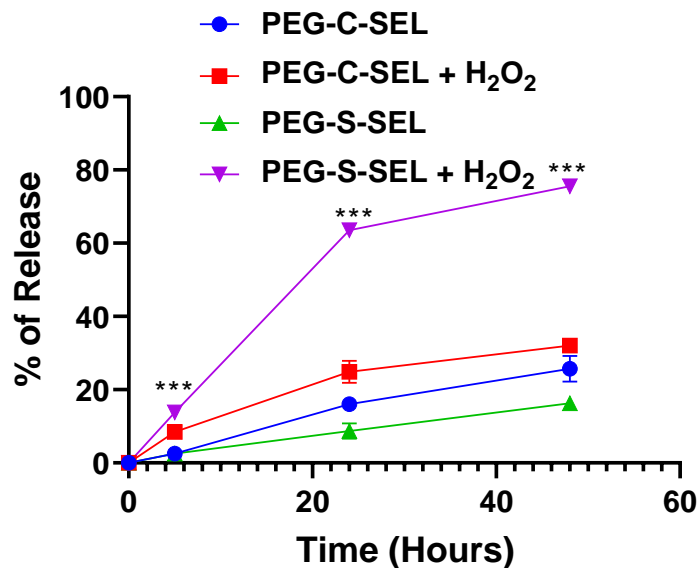

**Figure S3.** SEL drug release profiles of ROS responsive PEG-S-SEL conjugate and non-ROS responsive PEG-C-SEL conjugate. Results are mean  $\pm$  SD (n=3). \*\*\*, P < 0.001

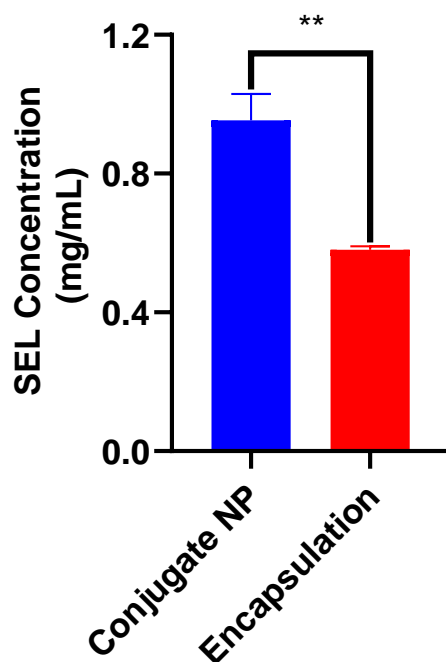

**Figure S4.** SEL concentration in NPs prepared with PEG-S-SEL conjugate and physical encapsulation of SEL free drug in micelle NP. Results are mean  $\pm$  SD (n=3). \*\*, P < 0.01.

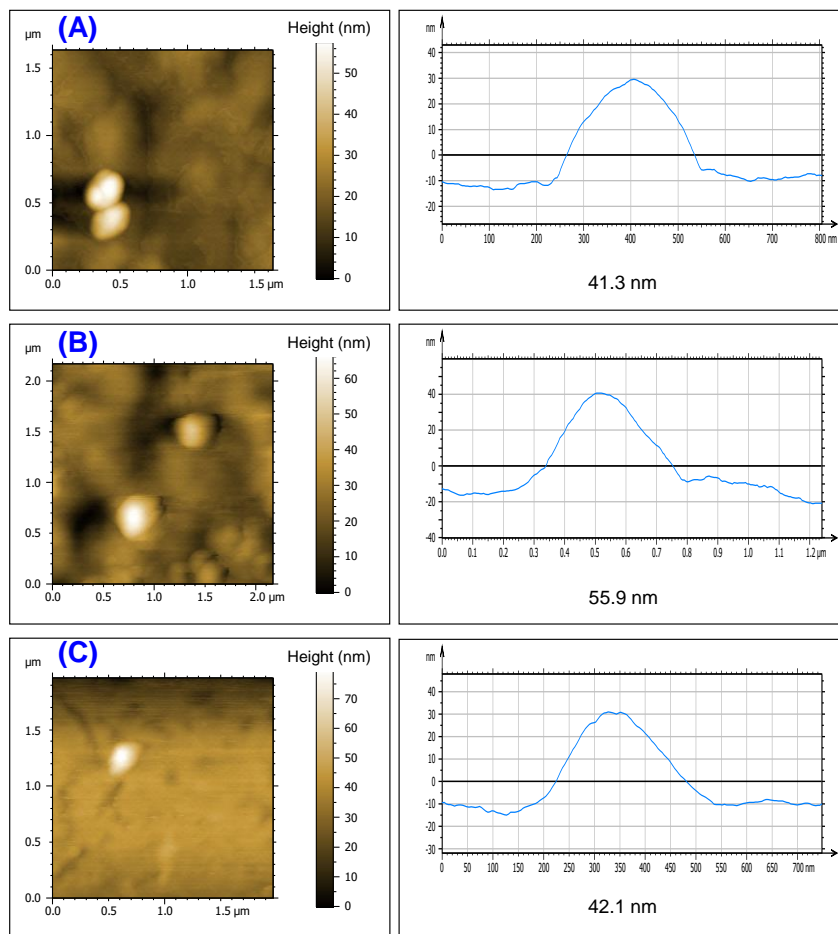

**Figure S5:** Atomic force microscope (AFM) images of (A) OSI-SEL NP, (B) SEL NP, (C) OSI NP

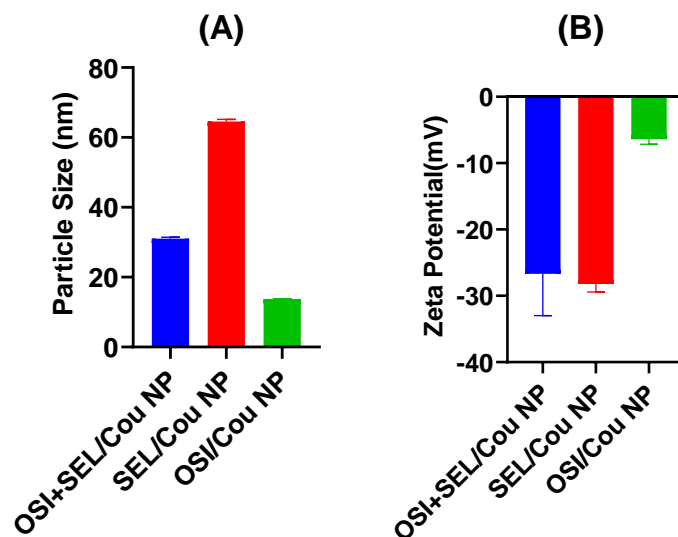

**Figure S6.** (A) Particle size and (B) Zeta potential of different Coumarin-6 loaded nanoparticles. Results are mean  $\pm$  SD (n=3).

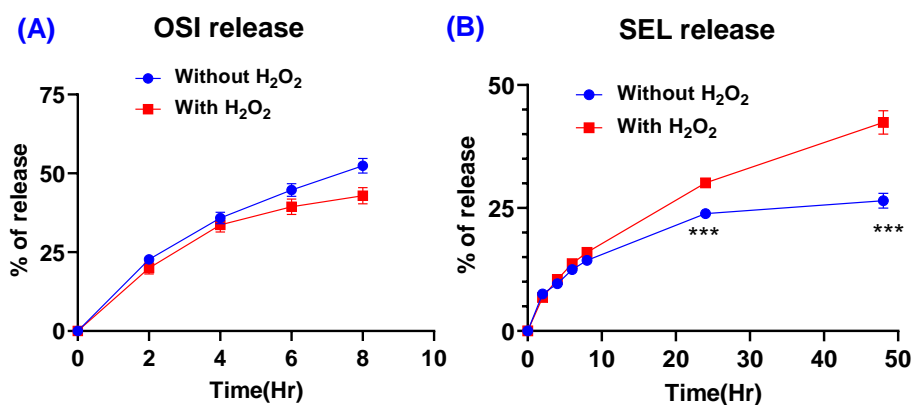

**Figure S7.** In vitro drug release from OSI-SEL NPs. Release of (A) OSI and (B) SEL from NPs in the presence or absence of 5 mM H<sub>2</sub>O<sub>2</sub>. Results are mean  $\pm$  SD (n=3). \*\*\*, P < 0.001

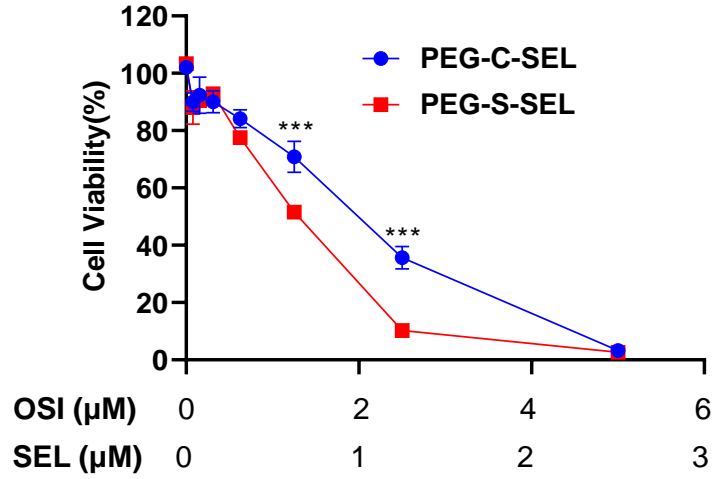

**Figure S8.** Anticancer activities of PEG-S-SEL and PEG-C-SEL in combination with OSI were determined with MTT assay. Results are mean  $\pm$  SD (n=4). \*\*\*, P < 0.001.

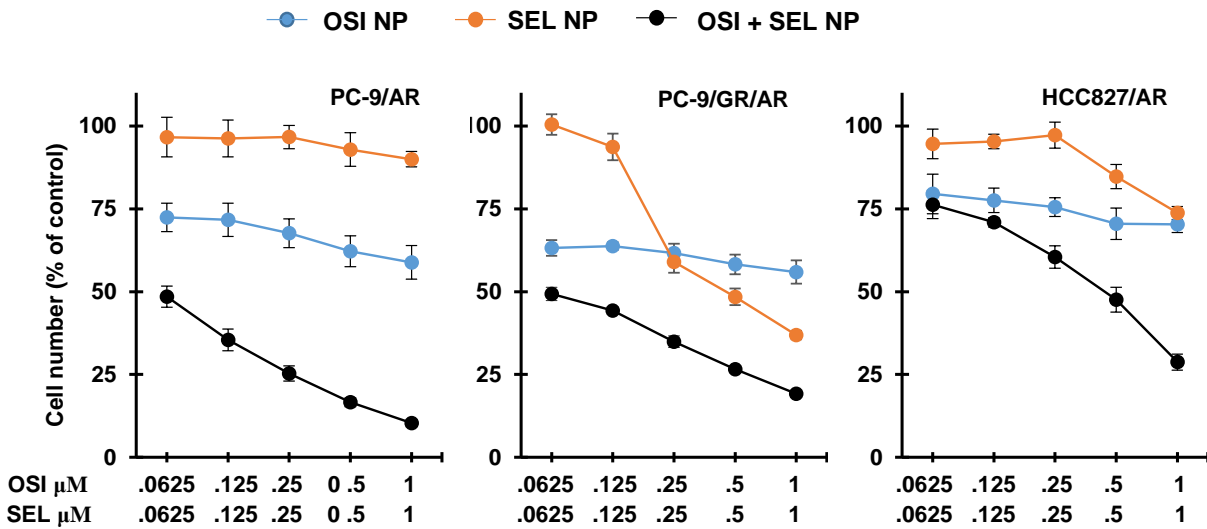

**Figure S9.** The indicated cell lines seeded in 96-well cell culture plates were treated with different concentrations of the tested NPs for 3 days. Cell numbers were determined with the SRB assay and expressed as the percentage of control. Results are mean  $\pm$  SD (n = 4).



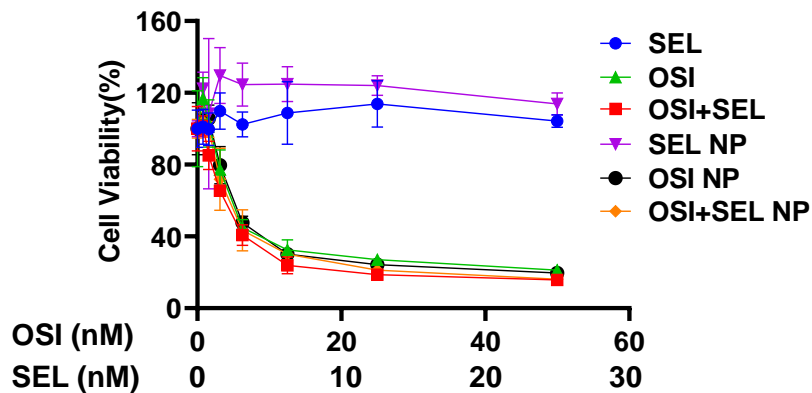

**Figure S10.** *In vitro* anticancer efficacy against OSI-sensitive PC9 NSCLC cells. Cell viability were determined with the MTT assay after treatment with different formulations for 48 hours. Results are mean  $\pm$  SD (n=3).

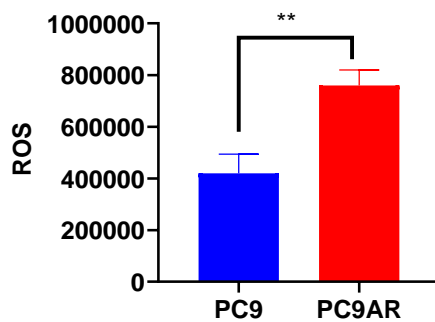

**Figure S11.** Intracellular ROS levels of PC9 and PC9 AR cells determined with DCFH-DA dye/flow cytometry method. Results are mean  $\pm$  SD (n=3). \*\*, P < 0.01.
